# Supplementary material for: Functionalities and architectures of coordination polymers with multi-dimensionalities via transition metal–dicarboxylate ligands
Source: Royal Society of Chemistry journal article supplement (doi:10.1039/c5ce00085h), 2015-01-01
Supplement: c5ce00085h1.pdf [file c5ce00085h1.pdf]

## *Supporting Information*

### **Functionalities and Architectures of Coordination Polymers with Multi-Dimensionalities *via* Transition Metal-Dicarboxylate Ligands**

**Xinyu Cao, Ling Li, Changxia Li, Lei, Lv, Rudan Huang\***

Key Laboratory of Cluster Science of Ministry of Education, School of Chemistry, Beijing  
Institute of Technology, Beijing 100081, PR China E-mail: [huangrudan1@bit.edu.cn](mailto:huangrudan1@bit.edu.cn)

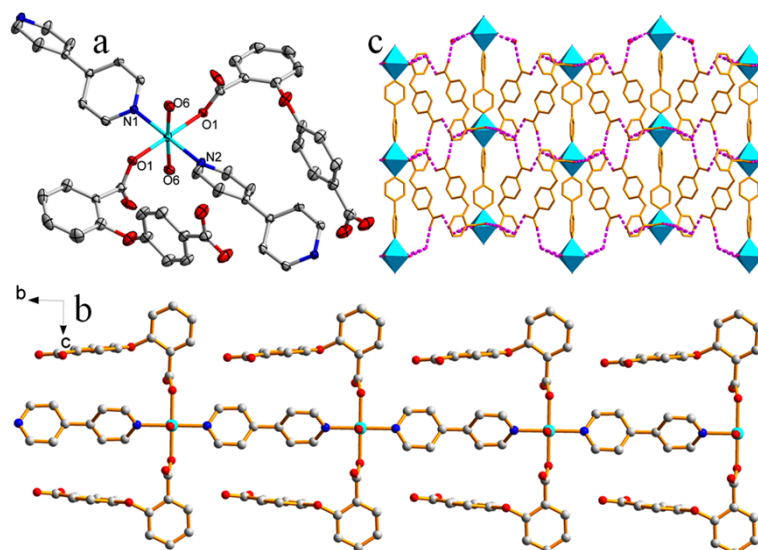

**Figure S1.** (a) The coordination environment of Ni(II) with the ellipsoids drawn at the 30% probability level. (b) 1D linear chain of **5**, viewed along the *a* axis. (c) 2D supramolecular layer of **5** formed through hydrogen bonding. Hydrogen atoms are omitted for clarity.

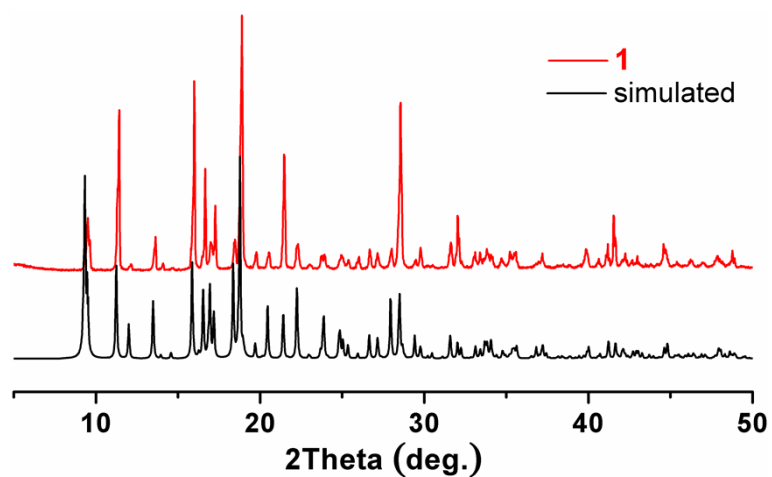

**Figure S2.** XRPD experimental and calculated patterns for complex 1.

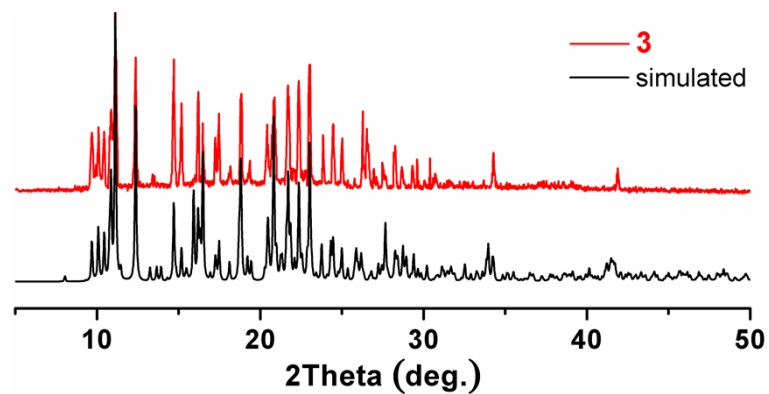

**Figure S3.** XRPD experimental and calculated patterns for complex 3.

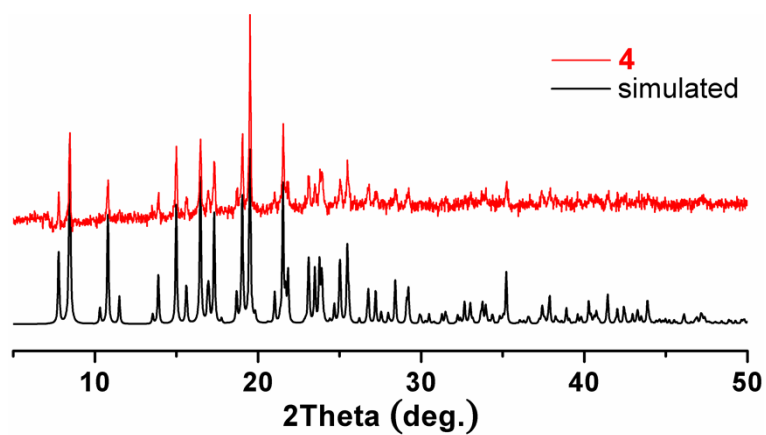

Figure S4. XRPD experimental and calculated patterns for complex 4.

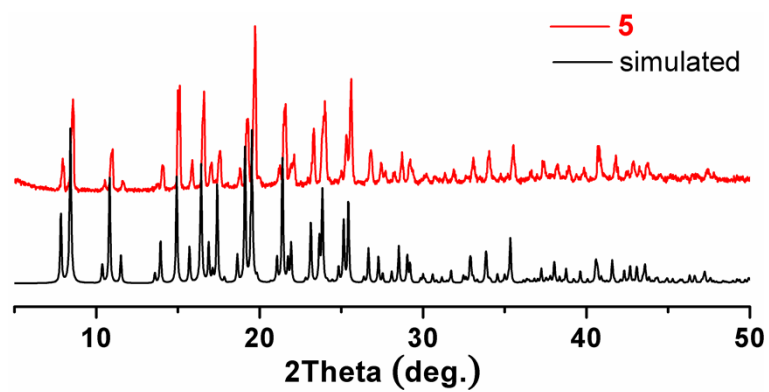

Figure S5. XRPD experimental and calculated patterns for complex 5.

### Proton Conductivity Studies

The presence of many interstitial and coordinated water molecules in the 2D ladder structure of complex **3** suggests the possibility of proton conductivity behaviour. Thus, the AC impedance measurements were carried out by two-probe method using Pt-pressed electrodes in the frequency range above 0.01Hz-1MHz (Figure S6). The solvent molecules in complex **3** were removed above 110 °C. The PXRD studies revealed that no structural change was observed after the removal of water molecules (Figure S7). There is no obvious change of the proton conductivity behaviour before and after the desorption coordination polymers.

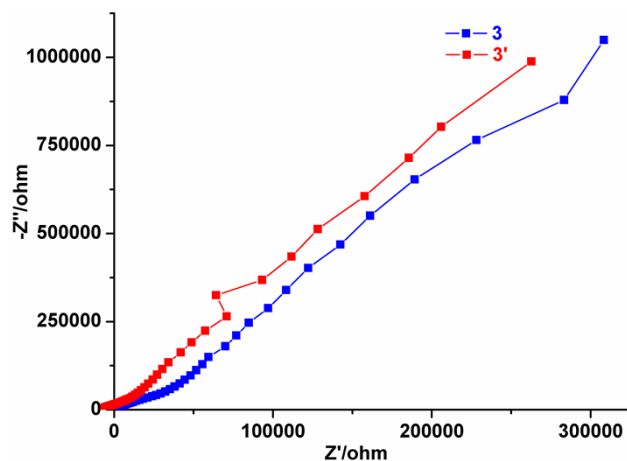

Figure S6. Proton conductivities for complexes **3** and **3'**.

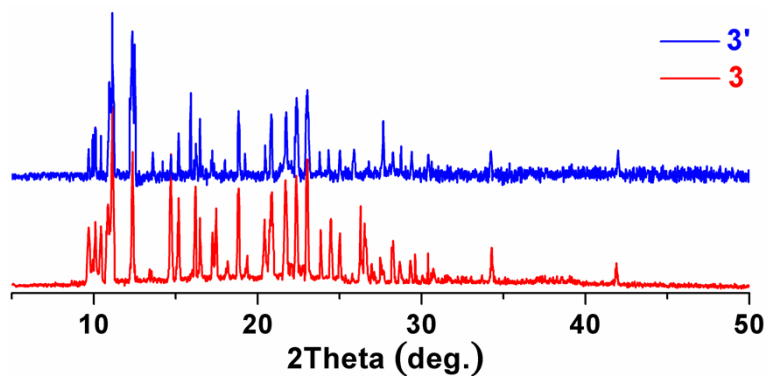

Figure S7. XRPD patterns for complexes **3** and **3'**.

**Table S1.** Selected Bond Lengths (Å) and Angles (deg) for **1-5**.

| <b>1</b>             |            |                      |            |
|----------------------|------------|----------------------|------------|
| Zn(1)-O(3)           | 1.930(3)   | Zn(1)-O(2)#1         | 1.949(2)   |
| Zn(1)-O(1)           | 1.974(3)   | Zn(1)-N(1)           | 2.003(3)   |
| Zn(1)-O(4)           | 2.559(3)   |                      |            |
| O(3)-Zn(1)-O(2)#1    | 116.29(11) | O(3)-Zn(1)-O(1)      | 102.80(12) |
| O(2)#1-Zn(1)-O(1)    | 116.14(11) | O(3)-Zn(1)-N(1)      | 127.43(12) |
| O(2)#1-Zn(1)-N(1)    | 98.93(12)  | O(1)-Zn(1)-N(1)      | 94.05(11)  |
| O(3)-Zn(1)-O(4)      | 56.13(10)  | O(2)#1-Zn(1)-O(4)    | 86.67(10)  |
| O(1)-Zn(1)-O(4)      | 155.45(10) | N(1)-Zn(1)-O(4)      | 90.96(11)  |
| <b>2</b>             |            |                      |            |
| Zn(1)-O(6)           | 1.956(3)   | Zn(1)-N(3)           | 2.095(4)   |
| Zn(1)-N(1)           | 2.096(4)   | Zn(1)-O(1)           | 2.155(4)   |
| Zn(1)-O(2)           | 2.167(4)   |                      |            |
| O(6)-Zn(1)-N(3)      | 98.83(16)  | O(6)-Zn(1)-N(1)      | 100.17(16) |
| N(3)-Zn(1)-N(1)      | 94.98(15)  | O(6)-Zn(1)-O(1)      | 159.43(14) |
| N(3)-Zn(1)-O(1)      | 91.65(16)  | N(1)-Zn(1)-O(1)      | 96.47(15)  |
| O(6)-Zn(1)-O(2)      | 104.68(15) | N(3)-Zn(1)-O(2)      | 149.47(17) |
| N(1)-Zn(1)-O(2)      | 99.67(16)  | O(1)-Zn(1)-O(2)      | 60.30(14)  |
| <b>3</b>             |            |                      |            |
| Co(1)-O(1)           | 2.042(2)   | Co(1)-N(3)           | 2.100(2)   |
| Co(1)-N(1)           | 2.104(2)   | Co(1)-O(6)           | 2.109(2)   |
| Co(1)-O(7)           | 2.237(2)   | Co(1)-O(2)           | 2.255(2)   |
| Co(2)-O(8)#1         | 2.0719(19) | Co(2)-O(8)#2         | 2.0719(19) |
| Co(2)-O(11)#3        | 2.092(2)   | Co(2)-O(11)          | 2.092(2)   |
| Co(2)-N(2)#3         | 2.191(2)   | Co(2)-N(2)           | 2.191(2)   |
| O(1)-Co(1)-N(3)      | 100.50(9)  | O(1)-Co(1)-N(1)      | 101.62(9)  |
| N(3)-Co(1)-N(1)      | 95.74(10)  | O(1)-Co(1)-O(6)      | 99.74(9)   |
| N(3)-Co(1)-O(6)      | 92.31(10)  | N(1)-Co(1)-O(6)      | 155.35(9)  |
| O(1)-Co(1)-O(7)      | 157.80(8)  | N(3)-Co(1)-O(7)      | 90.08(9)   |
| N(1)-Co(1)-O(7)      | 96.62(9)   | O(6)-Co(1)-O(7)      | 60.04(8)   |
| O(1)-Co(1)-O(2)      | 61.07(8)   | N(3)-Co(1)-O(2)      | 161.57(9)  |
| N(1)-Co(1)-O(2)      | 88.24(9)   | O(6)-Co(1)-O(2)      | 91.43(9)   |
| O(7)-Co(1)-O(2)      | 107.38(8)  | O(8)#1-Co(2)-O(8)#2  | 180.00(7)  |
| O(8)#1-Co(2)-O(11)#3 | 88.54(8)   | O(8)#2-Co(2)-O(11)#3 | 91.46(8)   |
| O(8)#1-Co(2)-O(11)   | 91.46(8)   | O(8)#2-Co(2)-O(11)   | 88.54(8)   |
| O(11)#3-Co(2)-O(11)  | 180.00(10) | O(8)#1-Co(2)-N(2)#3  | 90.09(9)   |
| O(8)#2-Co(2)-N(2)#3  | 89.91(9)   | O(11)#3-Co(2)-N(2)#3 | 94.41(9)   |
| O(11)-Co(2)-N(2)#3   | 85.59(9)   | O(8)#1-Co(2)-N(2)    | 89.91(9)   |
| O(8)#2-Co(2)-N(2)    | 90.09(9)   | O(11)#3-Co(2)-N(2)   | 85.59(9)   |
| O(11)-Co(2)-N(2)     | 94.41(9)   | N(2)#3-Co(2)-N(2)    | 180.00(12) |
| <b>4</b>             |            |                      |            |
| Co(1)-O(6)           | 2.1035(17) | Co(1)-O(6)#1         | 2.1035(17) |
| Co(1)-O(1)           | 2.1127(17) | Co(1)-O(1)#1         | 2.1127(17) |

|                     |            |                   |           |
|---------------------|------------|-------------------|-----------|
| Co(1)-N(2)          | 2.139(3)   | Co(1)-N(1)        | 2.153(3)  |
| O(6)-Co(1)-O(6)#1   | 174.92(10) | O(6)-Co(1)-O(1)   | 88.05(7)  |
| O(6)#1-Co(1)-O(1)   | 91.95(7)   | O(6)-Co(1)-O(1)#1 | 91.95(7)  |
| O(6)#1-Co(1)-O(1)#1 | 88.05(7)   | O(1)-Co(1)-O(1)#1 | 179.96(9) |
| O(6)-Co(1)-N(2)     | 87.46(5)   | O(6)#1-Co(1)-N(2) | 87.46(5)  |
| O(1)-Co(1)-N(2)     | 90.02(5)   | O(1)#1-Co(1)-N(2) | 90.02(5)  |
| O(6)-Co(1)-N(1)     | 92.54(5)   | O(6)#1-Co(1)-N(1) | 92.54(5)  |
| O(1)-Co(1)-N(1)     | 89.98(5)   | O(1)#1-Co(1)-N(1) | 89.98(5)  |
| N(2)-Co(1)-N(1)     | 180.0      |                   |           |

### 5

|                   |            |                     |            |
|-------------------|------------|---------------------|------------|
| Ni(1)-O(6)#1      | 2.062(2)   | Ni(1)-O(6)          | 2.062(2)   |
| Ni(1)-N(2)#2      | 2.083(4)   | Ni(1)-O(1)#1        | 2.084(2)   |
| Ni(1)-O(1)        | 2.084(2)   | Ni(1)-N(1)          | 2.110(4)   |
| O(6)#1-Ni(1)-O(6) | 174.74(14) | O(6)#1-Ni(1)-N(2)#2 | 87.37(7)   |
| O(6)-Ni(1)-N(2)#2 | 87.37(7)   | O(6)#1-Ni(1)-O(1)#1 | 87.61(10)  |
| O(6)-Ni(1)-O(1)#1 | 92.40(10)  | N(2)#2-Ni(1)-O(1)#1 | 90.08(7)   |
| O(6)#1-Ni(1)-O(1) | 92.40(10)  | O(6)-Ni(1)-O(1)     | 87.61(10)  |
| N(2)#2-Ni(1)-O(1) | 90.08(7)   | O(1)#1-Ni(1)-O(1)   | 179.85(13) |
| O(6)#1-Ni(1)-N(1) | 92.63(7)   | O(6)-Ni(1)-N(1)     | 92.63(7)   |
| N(2)#2-Ni(1)-N(1) | 180.000(1) | O(1)#1-Ni(1)-N(1)   | 89.92(7)   |
| O(1)-Ni(1)-N(1)   | 89.92(7)   |                     |            |

Symmetry transformations used to generate equivalent atoms: #1  $-x+1,-y,-z$  #2  $-x+3/2,y-1/2,-z+1/2$  #3  $-x+3/2,y+1/2,-z+1/2$  #4  $-x,-y-1,-z$  for **1**; #1  $-x+1,-y+1,-z+1$  #2  $x+1,y,z-1$  #3  $-x+2,-y+1,-z$  #4  $x-1,y,z+1$  #5  $-x,-y+1,-z+1$  for **3**; #1  $-x+1/2,y,-z+1/2$  #2  $x,y+1,z$  #3  $x,y-1,z$  for **4**; #1  $-x+3/2,y,-z+3/2$  #2  $x,y+1,z$  #3  $x,y-1,z$  for **5**.

**Table S2** Hydrogen bonding interactions in H<sub>2</sub>dpd and **1–5**

| D-H...A             | d(D...A) (Å) | ∠D-H...A(°) |
|---------------------|--------------|-------------|
| <b>2</b>            |              |             |
| O(4)-H(4)···O(11)   | 2.5598       | 170         |
| O(8)-H(8)···N(2)    | 2.6909       | 173         |
| O(11)-H(11C)···O(7) | 2.7658       | 178         |
| O(11)-H(11D)···N(4) | 2.8186       | 177         |
| <b>3</b>            |              |             |
| O(3)-H(3)···O(7)    | 2.6150       | 141         |
| O(12)-H(12C)···O(1) | 2.9938       | 178         |
| O(12)-H(12D)···O(9) | 2.8240       | 178         |
| <b>4</b>            |              |             |
| O(4)-H(4)···O(7)    | 2.6507       | 174         |
| O(6)-H(6C)···O(7)   | 2.9363       | 148         |
| O(7)-H(7C)···O(1)   | 2.7387       | 177         |
| O(7)-H(7D)···O(3)   | 2.8772       | 177         |
| <b>5</b>            |              |             |
| O(4)-H(4)···O(7)    | 2.6423       | 173         |
| O(6)-H(6B)···O(7)   | 2.9166       | 149         |

|                   |        |     |
|-------------------|--------|-----|
| O(7)-H(7C)···O(1) | 2.7468 | 177 |
| O(7)-H(7C)···O(6) | 2.9166 | 104 |
| O(7)-H(7D)···O(3) | 2.8486 | 177 |
